# Supplementary material for: Informal Employment and Poor Mental Health in a Sample of 180,260 Workers from 13 Iberoamerican Countries
Source: MDPI journal article supplement (doi:10.3390/ijerph19137883), 2022-06-27
Supplement: s1 [file s1]

**Supplementary Table S1.** Definition of employment condition by questionnaire.

| Criteria                | Country         | Survey                                                                          | Target and question                                                                                                                        | Employment condition                                                                                                                                            |                                                                                                                                                                                                                                                      |
|-------------------------|-----------------|---------------------------------------------------------------------------------|--------------------------------------------------------------------------------------------------------------------------------------------|-----------------------------------------------------------------------------------------------------------------------------------------------------------------|------------------------------------------------------------------------------------------------------------------------------------------------------------------------------------------------------------------------------------------------------|
|                         |                 |                                                                                 |                                                                                                                                            | Formal                                                                                                                                                          | Informal                                                                                                                                                                                                                                             |
| <b>Social security</b>  | Argentina       | National Survey of workers on Conditions of Employment, Work, Health and Safety | <b>Employees except for domestic workers:</b> Do you have a retirement discount for that job?                                              | 1. Yes                                                                                                                                                          | 2. No                                                                                                                                                                                                                                                |
|                         |                 |                                                                                 | <b>Domestic workers:</b> For that job, do you receive retirement contributions?                                                            | 1. Yes                                                                                                                                                          | 2. No                                                                                                                                                                                                                                                |
|                         |                 |                                                                                 | <b>Self employed and employers:</b> Regarding retirement payment...                                                                        | 1 You pay as “monotributista”<br>2. You pay as a social “monotributista”<br>3 You pay as a freelancer<br>4. You contribute to a provincial or professional fund | 5. You don't pay it because you don't have enough money to contribute<br>6. You don't pay it because the retirement would be very low<br>7.You don't not pay it because the retirement system is unreliable<br>8.You don't pay it for another reason |
|                         | Peru            | National Survey on Working Conditions, Safety and Health                        | <b>All:</b> Do you have a discount, do you contribute, are you affiliated with, or registered in any retirement system (ONP/AFP)?          | 1. Yes                                                                                                                                                          | 2. No                                                                                                                                                                                                                                                |
|                         | Central America | II Central American Survey of Working and Health Conditions                     | <b>All:</b> Are you currently contributing to any retirement, unemployment or disability insurance, or social security or insurance fund?  | 1. Yes                                                                                                                                                          | 2. No                                                                                                                                                                                                                                                |
| <b>Health insurance</b> | Brazil          | National Health Survey                                                          | <b>All:</b> Do you have any private, company or public medical health plan? Who is the holder of the medical health plan (single or main)? | 1. Yes; Holder                                                                                                                                                  | 1. Yes; Not holder<br>2. No                                                                                                                                                                                                                          |
| <b>Contract</b>         | Chile           | National Quality of Life and Health Survey                                      | <b>All:</b> In your main job, do you have a written employment contract?                                                                   | 1 Yes, I signed.                                                                                                                                                | 2 Yes, but I haven't signed<br>3 I do not have a contract<br>4 I do not remember or do not know if I have signed                                                                                                                                     |
|                         | Mexico          | National Household Survey                                                       | <b>Employees:</b> Do you have a written contract in your main job?                                                                         | 1. Yes                                                                                                                                                          | 2. No                                                                                                                                                                                                                                                |
|                         | Spain, Portugal | European Working Conditions Survey                                              | <b>Employees:</b> What type of contract do you have in your main paid job?                                                                 | 1 Permanent contract<br>2 Temporary contract<br>3 Contract with a temporary employment agency<br>4 Apprenticeship, training or internship contract              | 5 No contract                                                                                                                                                                                                                                        |

**Supplementary Table S2.** Population distribution by questionnaire, country and sex.

|                             | Questionnaire and country |             |            |            |            |            |             | continues |
|-----------------------------|---------------------------|-------------|------------|------------|------------|------------|-------------|-----------|
|                             | GHQ -12                   |             |            |            |            |            |             |           |
|                             | Costa Rica                | El Salvador | Guatemala  | Honduras   | Nicaragua  | Panamá     | Peru        |           |
|                             | N (%)                     | N (%)       | N (%)      | N (%)      | N (%)      | N (%)      | N (%)       |           |
| Men                         | 766 (66.9)                | 637 (66.4)  | 785 (58.4) | 779 (57.3) | 674 (63.9) | 921 (66.7) | 1629 (53.5) |           |
| Employment condition        |                           |             |            |            |            |            |             |           |
| Formal                      | 518 (62.3)                | 171 (16.3)  | 132 (12.0) | 139 (14.3) | 221 (24.0) | 488 (43.9) | 541 (37.1)  |           |
| Informal                    | 248 (37.7)                | 466 (83.7)  | 649 (88.0) | 636 (85.7) | 453 (76.1) | 429 (56.1) | 1071 (62.9) |           |
| Labor relationship          |                           |             |            |            |            |            |             |           |
| Employee                    | 417 (53.1)                | 317 (35.8)  | 288 (30.5) | 342 (45.6) | 279 (42.8) | 435 (43.2) | 921 (58.9)  |           |
| Self-employed or employer   | 348 (46.9)                | 320 (64.2)  | 497 (69.6) | 437 (54.4) | 395 (57.2) | 486 (56.8) | 708 (41.1)  |           |
| Occupational category       |                           |             |            |            |            |            |             |           |
| Non-manual                  | 388 (20.1)                | 287 (18.1)  | 354 (27.5) | 232 (17.5) | 276 (19.8) | 243 (20.8) | 759 (50.5)  |           |
| Manual                      | 378 (79.9)                | 348 (81.9)  | 431 (72.5) | 546 (82.5) | 396 (80.2) | 416 (79.3) | 870 (49.5)  |           |
| Age, years                  |                           |             |            |            |            |            |             |           |
| under 24                    | 90 (8.5)                  | 90 (11.4)   | 151 (28.2) | 98 (23.4)  | 95 (20.4)  | 139 (17.0) | 351 (20.8)  |           |
| 25-44                       | 351 (44.9)                | 312 (37.8)  | 357 (36.9) | 331 (39.9) | 347 (55.0) | 431 (45.0) | 716 (44.5)  |           |
| 45-64                       | 270 (37.2)                | 172 (30.5)  | 221 (27.7) | 261 (26.5) | 191 (22.1) | 284 (32.4) | 415 (26.2)  |           |
| ≥65                         | 55 (9.4)                  | 63 (20.3)   | 56 (7.2)   | 89 (10.2)  | 41 (2.5)   | 67 (5.6)   | 147 (8.5)   |           |
| Education achieved          |                           |             |            |            |            |            |             |           |
| Less than primary school    | 16 (7.0)                  | 27 (11.0)   | 53 (10.0)  | 62 (8.7)   | 66 (11.4)  | 25 (5.4)   | 83 (4.3)    |           |
| Primary school              | 263 (50.5)                | 159 (38.4)  | 326 (48.9) | 433 (57.3) | 227 (37.9) | 170 (24.6) | 258 (14.6)  |           |
| Secondary school            | 335 (33.3)                | 351 (42.6)  | 319 (33.2) | 223 (29.2) | 227 (35.9) | 522 (55.9) | 833 (52.3)  |           |
| Higher education            | 152 (9.3)                 | 100 (8.0)   | 87 (7.9)   | 61 (4.9)   | 154 (14.8) | 204 (14.2) | 455 (28.8)  |           |
| Marital status              |                           |             |            |            |            |            |             |           |
| Married or co-habiting      | 475 (66.8)                | 420 (63.6)  | 485 (60.1) | 564 (67.7) | 427 (62.5) | 502 (54.3) | 944 (56.4)  |           |
| Single, divorced or widowed | 291 (33.2)                | 217 (36.4)  | 298 (39.9) | 215 (32.3) | 245 (37.6) | 419 (45.7) | 684 (43.6)  |           |
| Women                       | 737 (33.1)                | 737 (33.1)  | 725 (41.6) | 728 (42.7) | 826 (36.1) | 584 (33.3) | 1484 (46.5) |           |
| Employment condition        |                           |             |            |            |            |            |             |           |
| Formal                      | 391 (54.19)               | 131 (12.1)  | 106 (11.7) | 90 (12.4)  | 199 (27.5) | 350 (53)   | 346 (26.2)  |           |
| Informal                    | 345 (45.81)               | 738 (87.9)  | 618 (88.3) | 634 (87.6) | 627 (72.5) | 232 (47)   | 1131 (73.8) |           |
| Labor relationship          |                           |             |            |            |            |            |             |           |
| Employee                    | 373 (52.36)               | 280 (27.1)  | 284 (39.4) | 289 (43.6) | 271 (36.2) | 355 (59.5) | 855 (58.2)  |           |
| Self-employed or employer   | 360 (47.64)               | 590 (72.9)  | 438 (60.6) | 439 (56.4) | 555 (63.8) | 228 (40.5) | 629 (41.8)  |           |
| Occupational category       |                           |             |            |            |            |            |             |           |
| Non-manual                  | 491 (48.49)               | 560 (44.9)  | 527 (58.4) | 398 (42.7) | 554 (50.7) | 438 (61.7) | 996 (69)    |           |
| Manual                      | 246 (51.51)               | 310 (55.1)  | 198 (41.6) | 330 (57.3) | 272 (49.3) | 146 (38.3) | 488 (31)    |           |
| Age, years                  |                           |             |            |            |            |            |             |           |
| under 24                    | 89 (11.0)                 | 79 (8.7)    | 185 (42.1) | 114 (28.2) | 96 (17.2)  | 76 (16)    | 363 (23.1)  |           |
| 25-44                       | 358 (51.2)                | 409 (43.1)  | 351 (36.2) | 374 (45.4) | 427 (56.5) | 312 (52.2) | 694 (47.4)  |           |
| 45-64                       | 260 (34.9)                | 305 (35.5)  | 148 (17.0) | 211 (22.7) | 256 (23.3) | 170 (29.0) | 326 (23.2)  |           |
| ≥65                         | 30 (2.98)                 | 77 (12.7)   | 41 (4.8)   | 29 (3.7)   | 47 (2.9)   | 26 (2.9)   | 101 (6.3)   |           |
| Education achieved          |                           |             |            |            |            |            |             |           |
| Less than primary school    | 11 (1.36)                 | 56 (8.8)    | 72 (11.4)  | 36 (5.2)   | 70 (7.9)   | 5 (0.7)    | 120 (6.6)   |           |
| Primary school              | 234 (33.8)                | 296 (38.3)  | 277 (38.9) | 346 (48.8) | 274 (32.8) | 69 (15.7)  | 268 (17.2)  |           |
| Secondary school            | 341 (47.2)                | 410 (42.9)  | 279 (39.1) | 265 (36.8) | 298 (40.2) | 314 (51.7) | 686 (48.2)  |           |
| Higher education            | 151 (17.7)                | 108 (9.9)   | 97 (10.7)  | 81 (9.2)   | 184 (19.1) | 196 (31.9) | 410 (28)    |           |
| Marital status              |                           |             |            |            |            |            |             |           |
| Married or co-habiting      | 391 (53.2)                | 509 (59.3)  | 410 (54.5) | 389 (51.4) | 460 (54.3) | 338 (56.4) | 797 (52.6)  |           |
| Single, divorced or widowed | 345 (46.8)                | 361 (40.7)  | 315 (45.5) | 339 (48.6) | 365 (45.7) | 243 (43.6) | 686 (47.4)  |           |
| Total                       | 1503                      | 1374        | 1510       | 1507       | 1500       | 1505       | 3113        |           |

| WHO-5     |          |       | Others |        |        |  |
|-----------|----------|-------|--------|--------|--------|--|
| Argentina | Portugal | Spain | Chile  | Brazil | Mexico |  |
| N (%)     | N (%)    | N (%) | N (%)  | N (%)  | N (%)  |  |

| 5035 (54.3)        | 396 (47.7)        | 1674 (53.2)        | 1529 (62.4)        | 29419 (53.7)        | 59836 (59.8)        |
|--------------------|-------------------|--------------------|--------------------|---------------------|---------------------|
| 3050 (59.0)        | 250 (91.3)        | 1240 (96.1)        | 986 (73.1)         | 6314 (24.4)         | 19217 (50.6)        |
| 1985 (41.0)        | 27 (8.7)          | 54 (3.9)           | 391 (27.0)         | 23105 (75.6)        | 19916 (49.4)        |
| 3451 (68.4)        | 280 (73.1)        | 1308 (78.1)        | 1062 (77.1)        | 16539 (56.0)        | 43084 (72.0)        |
| 1584 (31.6)        | 116 (26.9)        | 364 (22.0)         | 314 (22.9)         | 12880 (44.0)        | 16274 (17.4)        |
| 2473 (48.0)        | 183 (48.6)        | 865 (56.5)         | 556 (52.2)         | 11969 (37.6)        | -                   |
| 2436 (52.0)        | 213 (51.4)        | 809 (43.5)         | 671 (47.8)         | 17450 (62.4)        | -                   |
| 504 (12.0)         | 16 (4.3)          | 99 (4.5)           | 89 (9.0)           | 2792 (4.2)          | 12426 (20.1)        |
| 2574 (50.1)        | 141 (41.8)        | 856 (53.1)         | 653 (47.8)         | 14143 (48.7)        | 26629 (44.9)        |
| 1715 (34.0)        | 206 (48.1)        | 707 (41.9)         | 679 (38.5)         | 10707 (42.2)        | 16988 (28.8)        |
| 242 (3.9)          | 31 (5.8)          | 9 (0.4)            | 108 (4.7)          | 1777 (4.9)          | 3793 (6.1)          |
| 289 (5.5)          | 8 (2.1)           | 53 (3.0)           | 177 (10.9)         | 10824 (38.3)        | 8444 (13.7)         |
| 1745 (37.2)        | 123 (26.1)        | 135 (7.3)          | 271 (17.7)         | 4606 (15.2)         | 11352 (18.8)        |
| 1651 (31.5)        | 184 (49.0)        | 629 (34.1)         | 665 (38.1)         | 9577 (31.4)         | 35387 (59.4)        |
| 1344 (25.8)        | 78 (22.8)         | 852 (55.7)         | 366 (33.3)         | 4412 (15.1)         | 4653 (8.2)          |
| 3215 (65.1)        | 286 (84.8)        | 1076 (76.6)        | 945 (65.0)         | 20599 (72.9)        | 39631 (66.3)        |
| 1814 (34.9)        | 53 (15.2)         | 353 (23.5)         | 568 (35.0)         | 8820 (27.1)         | 20205 (33.8)        |
| <b>3931 (45.7)</b> | <b>500 (52.3)</b> | <b>1617 (46.8)</b> | <b>1597 (37.6)</b> | <b>22863 (46.3)</b> | <b>39851 (40.2)</b> |
| 2230 (55.2)        | 352 (92.1)        | 1263 (93.2)        | 956 (70.4)         | 6150 (30.3)         | 12958 (55.4)        |
| 1701 (44.9)        | 41 (7.9)          | 106 (6.8)          | 409 (29.6)         | 16713 (69.7)        | 11056 (44.6)        |
| 2967 (74.9)        | 401 (84.6)        | 1396 (85.9)        | 1106 (83.2)        | 16035 (70.6)        | 27413 (69.2)        |
| 964 (25.1)         | 99 (15.4)         | 220 (14.1)         | 244 (16.8)         | 6828 (29.4)         | 11937 (22.2)        |
| 2845 (72.1)        | 328 (67.4)        | 1157 (76.4)        | 837 (71.6)         | 15086 (62.4)        | -                   |
| 1050 (27.9)        | 172 (32.6)        | 460 (23.6)         | 384 (28.4)         | 7777 (37.6)         | -                   |
| 294 (9.6)          | 15 (4.3)          | 87 (4.6)           | 104 (10.7)         | 2081 (3.7)          | 7137 (17.1)         |
| 2074 (50.2)        | 208 (46.3)        | 834 (54.1)         | 801 (52.0)         | 11504 (49.8)        | 19286 (48.6)        |
| 1415 (36.6)        | 245 (46.2)        | 676 (40.3)         | 631 (33.8)         | 8321 (42.7)         | 11614 (29.7)        |
| 148 (3.6)          | 32 (3.2)          | 18 (1.1)           | 61 (3.6)           | 957 (3.8)           | 1814 (4.6)          |
| 151 (3.7)          | 15 (1.7)          | 35 (2.0)           | 161 (10.4)         | 5377 (25.7)         | 4899 (12.5)         |
| 981 (26.2)         | 135 (23.7)        | 126 (7.2)          | 268 (18.1)         | 2927 (12.4)         | 6467 (16.6)         |
| 1157 (29.3)        | 226 (47.4)        | 557 (33.3)         | 687 (37.1)         | 8679 (35.9)         | 24971 (62.0)        |
| 1636 (40.9)        | 123 (27.3)        | 895 (57.6)         | 413 (34.4)         | 5880 (26)           | 3514 (9.0)          |
| 1840 (56.8)        | 334 (79.4)        | 977 (71.9)         | 767 (51.6)         | 12425 (57.6)        | 21503 (52.7)        |
| 2085 (43.2)        | 96 (20.6)         | 457 (28.1)         | 786 (48.4)         | 10438 (42.4)        | 18348 (47.3)        |
| <b>8966</b>        | <b>896</b>        | <b>3291</b>        | <b>3126</b>        | <b>52282</b>        | <b>99687</b>        |

GHQ-12: 12-item General Health Questionnaire. WHO-5: World Health Organization - Five Well-Being Index. Percentages are weighted by specific survey weights. Employment condition in Spain, Portugal and Mexico was only available for employees. Information on occupational category was not available for Mexico.

**Supplementary Table S3.** Prevalence of poor mental health [% (95% CI)] according to work and sociodemographic variables, by questionnaire, country, and sex.

| Questionnaire and country                |                    |                    |                    |                    |                    | <i>continues</i>   |
|------------------------------------------|--------------------|--------------------|--------------------|--------------------|--------------------|--------------------|
| GHQ-12                                   |                    |                    |                    |                    |                    |                    |
| Men                                      | Costa Rica         | El Salvador        | Guatemala          | Honduras           | Nicaragua          | Panama             |
| <b>Total</b>                             | 15.1 (10.7 - 19.6) | 8.8 (5.4 - 12.3)   | 8.1 (5.9 - 11)     | 19.4 (16.3 - 22.9) | 21 (17.3 - 25.1)   | 22.8 (19.0 - 27.0) |
| <b>Employment condition<sup>1</sup></b>  |                    |                    |                    |                    |                    |                    |
| Formal                                   | 11.6 (6.5 - 16.7)  | 5.9 (2.1 - 9.7)    | 5.9 (2.0 - 16)     | 11.7 (6.5 - 20.1)  | 14.7 (9.2 - 22.6)  | 27.0 (22.0 - 32.7) |
| Informal                                 | 20.9 (12.7 - 29.1) | 9.4 (5.3 - 13.5)   | 8.2 (5.9 - 11.3)   | 20.6 (17.1 - 24.6) | 22.9 (18.6 - 28.0) | 19.2 (14.1 - 25.7) |
| <b>Labor relationship</b>                |                    |                    |                    |                    |                    |                    |
| Employee                                 | 11.1 (5.9 - 16.3)  | 9.5 (4.5 - 14.5)   | 7.2 (4.0 - 12.9)   | 18.2 (13.3 - 24.3) | 18.0 (12.8 - 24.7) | 25.6 (20.0 - 32.1) |
| Self-employed or employer                | 19.6 (12.3 - 27)   | 8.5 (3.9 - 13.1)   | 8.5 (5.9 - 12.1)   | 20.4 (16.6 - 24.8) | 23.2 (18.4 - 28.8) | 20.7 (15.9 - 26.5) |
| <b>Occupational category<sup>2</sup></b> |                    |                    |                    |                    |                    |                    |
| Non-manual                               | 14.6 (9.2 - 19.9)  | 10.1 (6.6 - 13.7)  | 3.7 (2.1 - 6.7)    | 12.7 (8.9 - 17.9)  | 10.9 (6.9 - 16.7)  | 21.5 (15.6 - 28.8) |
| Manual                                   | 15.3 (9.8 - 20.7)  | 8.6 (4.4 - 12.7)   | 9.8 (6.9 - 13.6)   | 20.8 (17.2 - 25.0) | 23.5 (19.1 - 28.5) | 23.1 (18.7 - 28.2) |
| <b>Age. years</b>                        |                    |                    |                    |                    |                    |                    |
| Under 24                                 | 15.6 (0.7 - 30.4)  | 8.9 (3.1 - 14.6)   | 4.5 (1.9 - 10.1)   | 13.8 (7.0 - 25.4)  | 12.6 (6.3 - 23.5)  | 20.6 (12.5 - 32.0) |
| 25-44                                    | 14.2 (7.8 - 20.6)  | 9.5 (4.6 - 14.4)   | 13.2 (9.0 - 19.0)  | 15 (11.2 - 19.6)   | 21.5 (16.5 - 27.4) | 22.7 (17.7 - 28.8) |
| 45-64                                    | 19.4 (11.1 - 27.6) | 9.3 (2.6 - 15.9)   | 5.2 (2.4 - 10.6)   | 26.7 (21.1 - 33.1) | 27.6 (20.4 - 36.2) | 24.0 (17.1 - 32.5) |
| ≥ 65                                     | 2.2 (0.1 - 4.3)    | 7.0 (-2.9 - 16.9)  | 7.8 (2.5 - 21.5)   | 30.8 (21.5 - 42.0) | 19.2 (8.1 - 39.3)  | 22.8 (11.2 - 41.0) |
| <b>Education</b>                         |                    |                    |                    |                    |                    |                    |
| Less than primary school                 | 8.1 (-2.1 - 18.2)  | 13.3 (-1.6 - 28.1) | 13.3 (5.9 - 27.4)  | 32.9 (18.4 - 51.7) | 37.1 (25.1 - 51.0) | 19.4 (5.6 - 49.3)  |
| Primary school                           | 18.9 (11.6 - 26.3) | 10.1 (3.0 - 17.3)  | 8.6 (5.6 - 13.1)   | 20.8 (17.0 - 25.3) | 18.3 (12.9 - 25.4) | 21.1 (13.7 - 31.2) |
| Secondary school                         | 12.9 (6 - 19.7)    | 6.6 (3.9 - 9.3)    | 7.1 (4.0 - 12.2)   | 15.0 (10.4 - 21.1) | 21.0 (15.1 - 28.4) | 23.9 (19.2 - 29.4) |
| Higher education                         | 7.7 (1.9 - 13.6)   | 8.5 (2.2 - 14.7)   | 2.9 (0.9 - 9.1)    | 4.5 (1.7 - 11.7)   | 15.2 (8.6 - 25.5)  | 22.4 (14.3 - 33.2) |
| <b>Marital status</b>                    |                    |                    |                    |                    |                    |                    |
| Married or co-habiting                   | 15.3 (9.6 - 21.1)  | 5.9 (2.4 - 9.4)    | 8.0 (5.3 - 11.7)   | 21.1 (17.7 - 25.1) | 21.7 (17.1 - 27.2) | 22.3 (17.5 - 27.9) |
| Single, divorced or widowed              | 14.7 (7.8 - 21.6)  | 14 (6.8 - 21.1)    | 8.3 (5.0 - 13.4)   | 15.7 (10.1 - 23.7) | 19.2 (13.8 - 26.1) | 23.4 (17.8 - 30.1) |
| Women                                    | Costa Rica         | El Salvador        | Guatemala          | Honduras           | Nicaragua          | Panama             |
| <b>Total</b>                             | 14.8 (11.0 - 18.7) | 11 (8.5 - 13.4)    | 13.4 (10.2 - 17.4) | 23.2 (19.4 - 27.5) | 21.4 (17.7 - 25.5) | 25.3 (20.7 - 30.7) |
| <b>Employment condition<sup>1</sup></b>  |                    |                    |                    |                    |                    |                    |
| Formal                                   | 14.3 (9.2 - 19.4)  | 14.5 (8.7 - 20.3)  | 7.3 (3.2 - 15.5)   | 18.4 (10.6 - 29.9) | 19.0 (12.5 - 27.9) | 24.1 (19.3 - 29.8) |
| Informal                                 | 15.4 (9.6 - 21.2)  | 10.5 (7.9 - 13.2)  | 14.2 (10.7 - 18.7) | 23.9 (19.8 - 28.7) | 22.3 (18.1 - 27.1) | 26.8 (18.9 - 36.6) |
| <b>Labor relationship</b>                |                    |                    |                    |                    |                    |                    |
| Employee                                 | 12.5 (7.8 - 17.3)  | 13.9 (9.4 - 18.4)  | 9.7 (5.3 - 17.0)   | 21.6 (15.3 - 29.6) | 21.7 (15.5 - 29.6) | 24.0 (18 - 31.2)   |
| Self-employed or employer                | 17 (10.9 - 23.1)   | 9.9 (7.0 - 12.8)   | 15.2 (11.2 - 20.4) | 24.4 (20.1 - 29.3) | 21.1 (16.9 - 26.2) | 27.8 (20.7 - 36.2) |
| <b>Occupational category<sup>2</sup></b> |                    |                    |                    |                    |                    |                    |
| Non-manual                               | 16.2 (11.2 - 21.2) | 13 (10 - 16.1)     | 10.5 (7.5 - 14.5)  | 25.2 (19.3 - 32.2) | 17.4 (13.9 - 21.4) | 23.2 (19.1 - 27.9) |
| Manual                                   | 13.5 (7.7 - 19.2)  | 9.3 (5.7 - 13)     | 17.4 (11.4 - 25.7) | 21.7 (17.0 - 27.2) | 25.5 (19.2 - 32.9) | 28.8 (19.1 - 40.8) |
| <b>Age. years</b>                        |                    |                    |                    |                    |                    |                    |
| under 24                                 | 7.3 (2.5 - 12.1)   | 11.6 (3.3 - 19.9)  | 9.5 (5.0 - 17.4)   | 19.9 (11.2 - 32.7) | 21.5 (11.9 - 35.9) | 19.7 (10.8 - 33.2) |
| 25-44                                    | 17.1 (10.9 - 23.2) | 12.5 (8.9 - 16.2)  | 15.9 (11.3 - 21.9) | 22.6 (18.4 - 27.4) | 20.8 (16.1 - 26.4) | 26.1 (19.5 - 33.9) |
| 45-64                                    | 14.1 (8.1 - 20.2)  | 8.7 (5.0 - 12.4)   | 16.7 (9.8 - 27.1)  | 24.8 (18.6 - 32.3) | 22.4 (16.4 - 29.7) | 24.3 (17.3 - 33.2) |
| ≥65                                      | 11.5 (0.3 - 22.6)  | 11.7 (3.1 - 20.3)  | 16.5 (5.1 - 41.7)  | 45.2 (26.4 - 65.5) | 23.3 (10.4 - 44.3) | 53.7 (25.6 - 79.7) |
| <b>Education</b>                         |                    |                    |                    |                    |                    |                    |
| Less than primary school                 | 56.0 (17.9 - 94.1) | 16.5 (3.7 - 29.3)  | 26.8 (15.2 - 42.9) | 48.2 (30.5 - 66.4) | 37.7 (24.6 - 53.0) | 36.5 (8.7 - 77.5)  |
| Primary school                           | 11.3 (6.1 - 16.5)  | 8.5 (5.0 - 11.9)   | 13.5 (8.7 - 20.4)  | 27.6 (21.4 - 34.7) | 24.1 (17.5 - 32.2) | 35.7 (19.2 - 56.5) |
| Secondary school                         | 17.2 (11.0 - 23.4) | 11.4 (7.7 - 15.1)  | 11.6 (7.1 - 18.4)  | 17.2 (12.4 - 23.4) | 19.5 (13.9 - 26.5) | 25.3 (19.7 - 31.9) |
| Higher education                         | 11.8 (3.7 - 20.0)  | 14.2 (7.8 - 20.5)  | 5.0 (2.1 - 11.5)   | 9.3 (4.9 - 17.0)   | 13.9 (8.7 - 21.4)  | 20.0 (13.9 - 28.0) |

**Marital status**

|                             |                   |                   |                    |                    |                    |                    |
|-----------------------------|-------------------|-------------------|--------------------|--------------------|--------------------|--------------------|
| Married or co-habiting      | 13.8 (8.5 - 19.1) | 10.3 (6.9 - 13.6) | 14.8 (10.5 - 20.4) | 23.4 (18.9 - 28.6) | 20.9 (16.1 - 26.8) | 25.1 (19.1 - 32.3) |
| Single, divorced or widowed | 16 (10.3 - 21.6)  | 12.0 (8.5 - 15.6) | 11.7 (7.3 - 18.0)  | 23.0 (17.1 - 30.2) | 21.9 (16.8 - 28.2) | 25.7 (18.8 - 34.0) |

| Questionnaire and country |                    |                    |                    |                    |                    |                    |
|---------------------------|--------------------|--------------------|--------------------|--------------------|--------------------|--------------------|
| GHQ-12                    | WHO-5              |                    | Other              |                    |                    |                    |
| Peru                      | Argentina          | Portugal           | Spain              | Chile              | Brazil             | Mexico             |
| 27.9 (25.5 - 30.4)        | 15.6 (14.4 - 16.8) | 11.6 (8.4 - 15.8)  | 9.9 (8.4 - 11.8)   | 15.8 (13.3 - 18.6) | 4.6 (4.2 - 5.0)    | 3.7 (3.5 - 3.9)    |
| 20.5 (16.7 - 24.3)        | 15.5 (13.5 - 17.5) | 11.1 (7.4 - 16.4)  | 9.8 (8.0 - 12)     | 15.1 (12.1 - 18.8) | 4.8 (4.0 - 5.8)    | 3.0 (2.6 - 3.4)    |
| 32.3 (29.1 - 35.4)        | 15.7 (14.0 - 17.5) | 10.7 (3.1 - 30.7)  | 19.7 (9.1 - 37.4)  | 17.1 (12.4 - 23.0) | 4.5 (4.1 - 5.0)    | 3.5 (3.1 - 3.9)    |
| 25.9 (22.8 - 29.1)        | 14.7 (13.0 - 16.3) | 11.2 (7.7 - 16.1)  | 10.2 (8.3 - 12.3)  | 16.6 (13.6 - 20.2) | 4.3 (3.8 - 4.8)    | 3.2 (2.9 - 3.4)    |
| 30.8 (27.0 - 34.6)        | 17.6 (15.6 - 19.7) | 12.7 (6.8 - 22.6)  | 9.3 (6.3 - 13.4)   | 13.0 (8.6 - 19.1)  | 4.9 (4.3 - 5.6)    | 5.2 (4.6 - 5.8)    |
| 23.3 (20.1 - 26.8)        | 15.6 (14.3 - 17.0) | 9.1 (5.2 - 15.4)   | 9.9 (7.7 - 12.6)   | 12.3 (8.8 - 16.9)  | 5.5 (4.8 - 6.2)    | -                  |
| 32.3 (28.9 - 35.9)        | 15.8 (13.3 - 18.2) | 14.1 (9.5 - 20.4)  | 10.0 (7.8 - 12.8)  | 17.8 (14.0 - 22.5) | 4.0 (3.6 - 4.5)    | -                  |
| 23.6 (19.1 - 28.9)        | 13.6 (7.2 - 20.0)  | 4.6 (0.6 - 27.7)   | 4.9 (2.1 - 11.0)   | 7.5 (3.5 - 15.3)   | 4.4 (3.3 - 5.8)    | 1.4 (1.1 - 1.8)    |
| 23.6 (20.2 - 27.4)        | 14.9 (13.5 - 16.4) | 11.8 (6.9 - 19.2)  | 10.2 (7.9 - 12.9)  | 14.8 (11.2 - 19.5) | 4.4 (3.9 - 4.9)    | 3.4 (3.1 - 3.7)    |
| 32.6 (27.8 - 37.8)        | 18.1 (16.2 - 20.0) | 12.8 (8.3 - 19.3)  | 10.4 (8.0 - 13.3)  | 17.8 (14.1 - 22.2) | 5.0 (4.3 - 5.8)    | 5.3 (4.8 - 5.8)    |
| 46.5 (37.8 - 55.5)        | 8.2 (3.9 - 12.5)   | -                  | -                  | 24.9 (15.2 - 38.0) | 3.3 (2.2 - 4.8)    | 6.2 (5.2 - 7.4)    |
| 45.7 (34.6 - 57.3)        | 18.6 (11.2 - 25.9) | 15.6 (2.2 - 60.3)  | 20.3 (9.5 - 38.2)  | 28.5 (20.1 - 38.7) | 4.5 (3.9 - 5.2)    | 5.0 (4.4 - 5.6)    |
| 41.3 (34.7 - 48.3)        | 16.2 (14.2 - 18.1) | 14.7 (8.2 - 24.8)  | 8.9 (4.7 - 16.1)   | 16.7 (11.6 - 23.3) | 4.6 (3.6 - 5.7)    | 3.9 (3.4 - 4.4)    |
| 26.5 (23.2 - 30.0)        | 13.5 (11.8 - 15.2) | 13.3 (8.6 - 19.9)  | 9.0 (6.7 - 12.1)   | 15.7 (12.0 - 20.3) | 4.6 (3.9 - 5.3)    | 3.3 (3.0 - 3.6)    |
| 21.5 (17.6 - 26.0)        | 16.7 (14.7 - 18.7) | 3.4 (1.2 - 9.4)    | 10.1 (8 - 12.8)    | 10.8 (6.8 - 16.7)  | 4.7 (3.8 - 5.8)    | 4.1 (3.3 - 5.1)    |
| 29.0 (25.8 - 32.4)        | 15.6 (14.3 - 16.9) | 12.2 (8.4 - 17.3)  | 10.6 (8.5 - 13.0)  | 14.6 (11.8 - 17.9) | 4.1 (3.7 - 4.6)    | 4.2 (4.0 - 4.5)    |
| 26.6 (23.1 - 30.4)        | 15.6 (13.5 - 17.7) | 11.4 (4.7 - 25.3)  | 5.8 (3.7 - 9.0)    | 17.4 (12.9 - 22.9) | 5.9 (5.1 - 6.7)    | 2.6 (2.3 - 3.0)    |
| Peru                      | Argentina          | Portugal           | Spain              | Chile              | Brazil             | Mexico             |
| 32.5 (29.9 - 35.3)        | 21.9 (20.2 - 23.5) | 14.1 (11.1 - 17.7) | 13.7 (11.8 - 15.9) | 21.8 (19.0 - 25.0) | 13.3 (12.6 - 14.1) | 6.5 (6.2 - 6.9)    |
| 24.3 (19.1 - 29.5)        | 21.4 (19.7 - 23.1) | 12.9 (9.6 - 17.1)  | 12.4 (10.4 - 14.8) | 18.9 (15.6 - 22.8) | 11.9 (10.6 - 13.4) | 4.6 (4.1 - 5.1)    |
| 35.3 (32.2 - 38.5)        | 22.4 (19.0 - 25.8) | 21.9 (10.3 - 40.7) | 18.3 (11.0 - 29.0) | 28.5 (21.9 - 36.2) | 13.9 (13.1 - 14.8) | 7.1 (6.4 - 7.8)    |
| 27.3 (24.0 - 30.6)        | 20.6 (17.6 - 23.6) | 13.5 (10.3 - 17.6) | 12.9 (10.9 - 15.2) | 20.3 (17.1 - 24.1) | 12.9 (12.0 - 13.8) | 5.5 (5.1 - 5.9)    |
| 39.8 (35.5 - 44.2)        | 25.7 (13.2 - 38.1) | 17.1 (10.7 - 26.2) | 18.9 (13.3 - 26.1) | 28.5 (19.9 - 39.0) | 14.4 (13.0 - 15.9) | 9.1 (8.2 - 10.0)   |
| 28.9 (25.8 - 32.1)        | 20.7 (19.0 - 22.3) | 11.5 (8.3 - 15.7)  | 13.5 (11.4 - 16.0) | 19.8 (16.1 - 24.3) | 13.1 (12.2 - 14.0) | -                  |
| 40.8 (36.0 - 45.9)        | 25.3 (18.1 - 32.5) | 19.5 (13.7 - 26.9) | 14.5 (10.8 - 19.2) | 27.9 (21.5 - 35.4) | 13.7 (12.5 - 15.0) | -                  |
| 25.5 (20.8 - 30.7)        | 24.3 (13.1 - 35.5) | 15.7 (3.8 - 47.0)  | 2.7 (0.5 - 12.7)   | 16.4 (8.5 - 29.2)  | 15.5 (13.3 - 18.0) | 2.3 (1.9 - 2.8)    |
| 30.6 (26.9 - 34.6)        | 22.7 (21.1 - 24.4) | 7.9 (5.0 - 12.3)   | 12.4 (9.9 - 15.4)  | 17.2 (13.6 - 21.4) | 13.1 (12.1 - 14.1) | 5.5 (5.1 - 6.0)    |
| 37.1 (31.3 - 43.2)        | 21.0 (18.7 - 23.2) | 19.0 (14.1 - 25.1) | 16.8 (13.6 - 20.6) | 30.9 (25.8 - 36.4) | 13.8 (12.6 - 15.1) | 9.9 (9.1 - 10.7)   |
| 55.6 (44.5 - 66.1)        | 13.1 (7.3 - 18.9)  | 30.5 (15.4 - 51.4) | 15.0 (4.6 - 39.4)  | 21.1 (11.5 - 35.7) | 8.9 (6.4 - 12.2)   | 11.8 (10.0 - 13.8) |
| 51.1 (41.1 - 60.9)        | 26.2 (14.6 - 37.7) | 47.7 (23.3 - 73.3) | 20.2 (9.0 - 39.1)  | 38.9 (28.0 - 51.0) | 15.5 (14.0 - 17.1) | 10.8 (9.7 - 12.1)  |

|                    |                    |                    |                    |                    |                    |                 |
|--------------------|--------------------|--------------------|--------------------|--------------------|--------------------|-----------------|
| 41.3 (34.9 - 48.1) | 21.8 (19.0 - 24.7) | 20.1 (13.4 - 28.9) | 27.4 (18.6 - 38.4) | 27.3 (20.7 - 35.0) | 15.5 (13.4 - 17.8) | 8.3 (7.4 - 9.3) |
| 32.6 (28.7 - 36.7) | 24.8 (16.4 - 33.2) | 14.1 (9.8 - 19.7)  | 11.7 (9.1 - 15.1)  | 19.9 (15.8 - 24.6) | 12.3 (11.2 - 13.6) | 5.4 (5.0 - 5.8) |
| 22.8 (18.7 - 27.5) | 19.5 (14.1 - 24.9) | 7.1 (3.7 - 13.3)   | 13.0 (10.5 - 16.0) | 16.9 (12.1 - 23.0) | 11.5 (10.2 - 13.0) | 5.2 (4.1 - 6.5) |
| 30.7 (27.3 - 34.3) | 21.3 (19.4 - 23.1) | 13.1 (9.7 - 17.5)  | 13.2 (10.8 - 16)   | 20.4 (16.7 - 24.6) | 12.6 (11.6 - 13.6) | 6.2 (5.8 - 6.7) |
| 34.5 (30.5 - 38.6) | 22.8 (20.0 - 25.5) | 19.4 (12.1 - 29.5) | 14.5 (11.0 - 18.8) | 22.3 (18.0 - 27.2) | 14.4 (13.2 - 15.5) | 6.9 (6.4 - 7.5) |

---

GHQ-12: 12-item General Health Questionnaire. WHO-5: World Health Organization - Five Well-Being Index. Percentages are weighted by specific survey weights. Employment condition in Spain, Portugal and Mexico was only available for employees. Information on occupational category was not available for Mexico.
